# Supplementary material for: Detection of m6A RNA modifications at single-nucleotide resolution using m6A-selective allyl chemical labeling and sequencing
Source: PubMed Central journal article supplement — STAR Protoc. 2022 Sep 15;3(4):101677. doi: 10.1016/j.xpro.2022.101677 (PMC9485529; doi:10.1016/j.xpro.2022.101677), 2022-09-15
Supplement: mmc1.pdf [file mmc1.pdf]

| Name                                                                                         | Sequence (5'to 3')                                               |
|----------------------------------------------------------------------------------------------|------------------------------------------------------------------|
| MALDI_Probe_A                                                                                | CGUGGACUGGCU-biotin                                              |
| MALDI_Probe_m <sup>6</sup> A                                                                 | CGUGGm <sup>6</sup> ACUGGCU-biotin                               |
| Validation_Probe_NNm <sup>6</sup> AN<br>N                                                    | UCGACGUNNm <sup>6</sup> ANNGGCAUUGCU                             |
| Validation_Probe_GGam <sup>6</sup> AC<br>U<br>(am <sup>6</sup> A = allylic m <sup>6</sup> A) | CUCUCGACGUGGam <sup>6</sup> ACUGGCAUUGCGCUCUC                    |
| Validation_Probe_GGa <sup>6</sup> ACU<br>(a <sup>6</sup> A = allylic A)                      | CUCUCGACGUGGa <sup>6</sup> ACUGGCAUUGCGCUCUC                     |
| Validation_Probe_NNAm <sup>6</sup> A<br>NN                                                   | UCGACGUNNam <sup>6</sup> ANNGGCAUUGCU                            |
| Validation_Probe_NNa <sup>6</sup> ANN                                                        | UCGACGUNNa <sup>6</sup> ANNGGCAUUGCU                             |
| Validation_Probe_m <sup>6</sup> A                                                            | CGUGGm <sup>6</sup> ACUGGCU-biotin                               |
| Validation_Probe_8 A :1<br>m <sup>6</sup> A                                                  | CGCAAUGCUUCUAGGCGGm <sup>6</sup> ACUAUGACUUAGUU<br>GCGUAC-biotin |
| Calibration_spike-in_1 (0%<br>m <sup>6</sup> A)                                              | UAUCUGUCAUCGCUCUCGACGUGGACUGGCAUUGC<br>GCUCUC                    |
| Calibration_spike-in_2<br>(25% m <sup>6</sup> A)                                             | UAUCUGUCUAGCCUCUCGACGUGGm <sup>6</sup> ACUGGCAUU<br>GCGCUCUC     |
| Calibration_spike-in_3<br>(50% m <sup>6</sup> A)                                             | UAUCUGUCCGAUCUCUCGACGUGGm <sup>6</sup> ACUGGCAUU<br>GCGCUCUC     |
| Calibration_spike-in_4<br>(100% m <sup>6</sup> A)                                            | UAUCUGUCGCUACUCUCGACGUGGm <sup>6</sup> ACUGGCAUU<br>GCGCUCUC     |
| Calibration_NN_spike-in_1<br>(0% m <sup>6</sup> A)                                           | UA UCU GUC AUC G UCG ACG UNNANN GGC AUU<br>GCU                   |
| Calibration_NN_spike-in_2<br>(25% m <sup>6</sup> A)                                          | UA UCU GUC UAG C UCG ACG UNNm <sup>6</sup> ANN GGC AUU<br>GCU    |
| Calibration_NN_spike-in_3<br>(50% m <sup>6</sup> A)                                          | UA UCU GUC CGA U UCG ACG UNNm <sup>6</sup> ANN GGC AUU<br>GCU    |
| Calibration_NN_spike-in_4<br>(100% m <sup>6</sup> A)                                         | UA UCU GUC GCU A UCG ACG UNNm <sup>6</sup> ANN GGC AUU<br>GCU    |

**Table S1. RNA Probes used in this study. Related to “Before you begin” “Preparation of spike-in probes” Step 9 and “Quality control of MjDim1 activity” Step 17.**

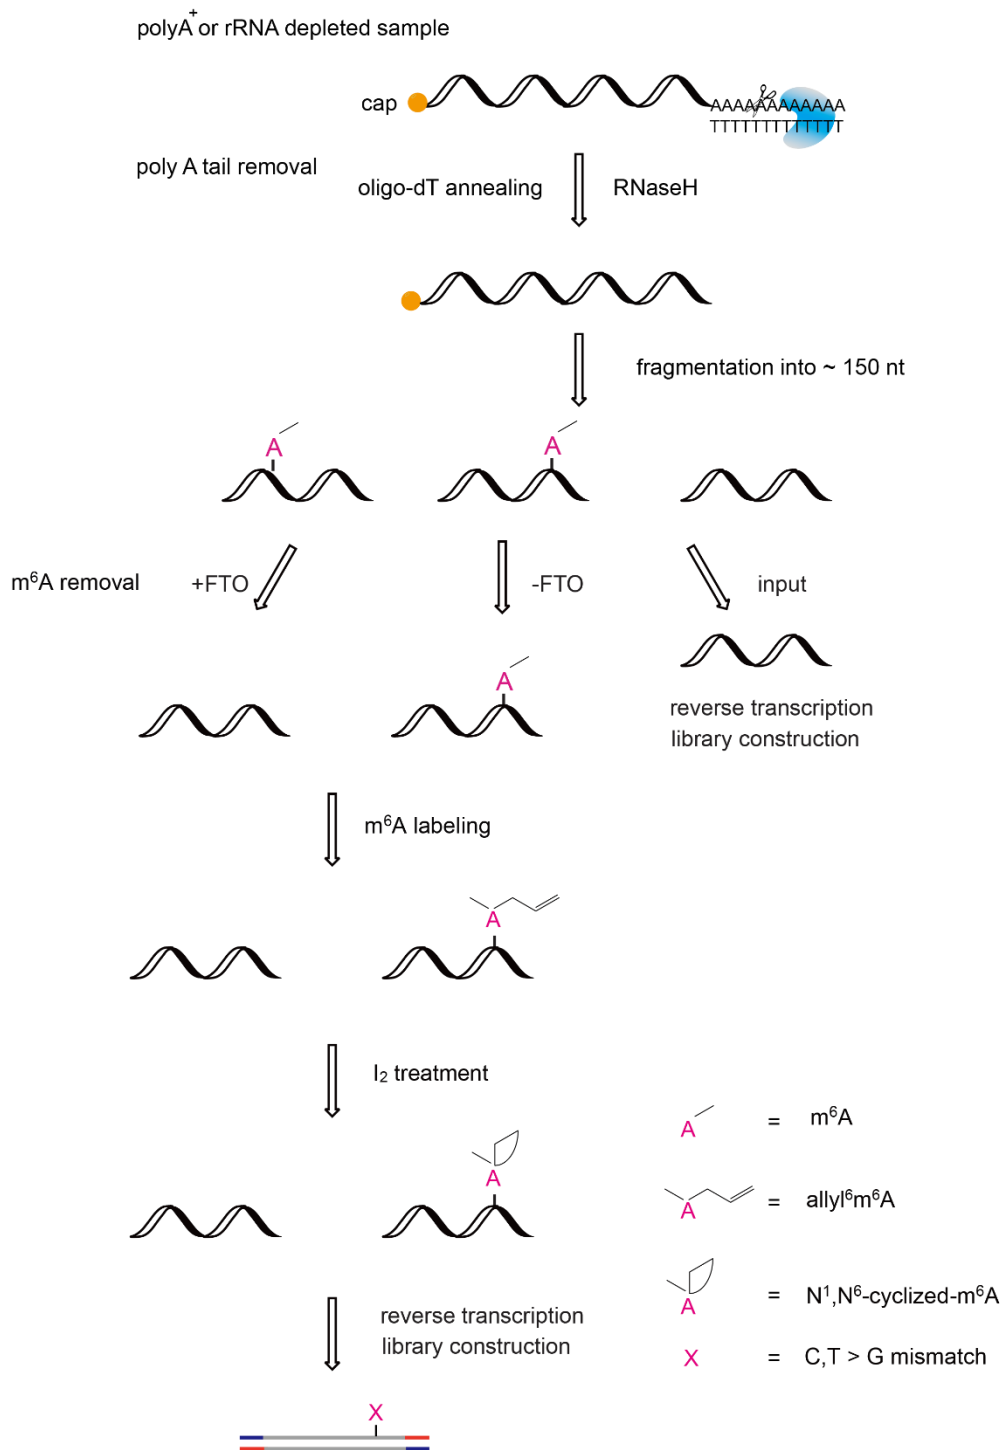

**Figure S1. Schematic diagram of m<sup>6</sup>A-SAC-seq, related to Steps 3-5 (Library preparation).**

Fragmented RNA sample is divided into 3 groups: Input group (reference), experimental group (FTO-), and control group (FTO+, m<sup>6</sup>A demethylase treatment). A comparison of results from treated RNA versus reference and control group could accurately identify bona fide m<sup>6</sup>A sites in the transcriptome. Note that the control group (FTO+ treatment) might be omitted for accurate identification of more than 90% m<sup>6</sup>A sites in the transcriptome.

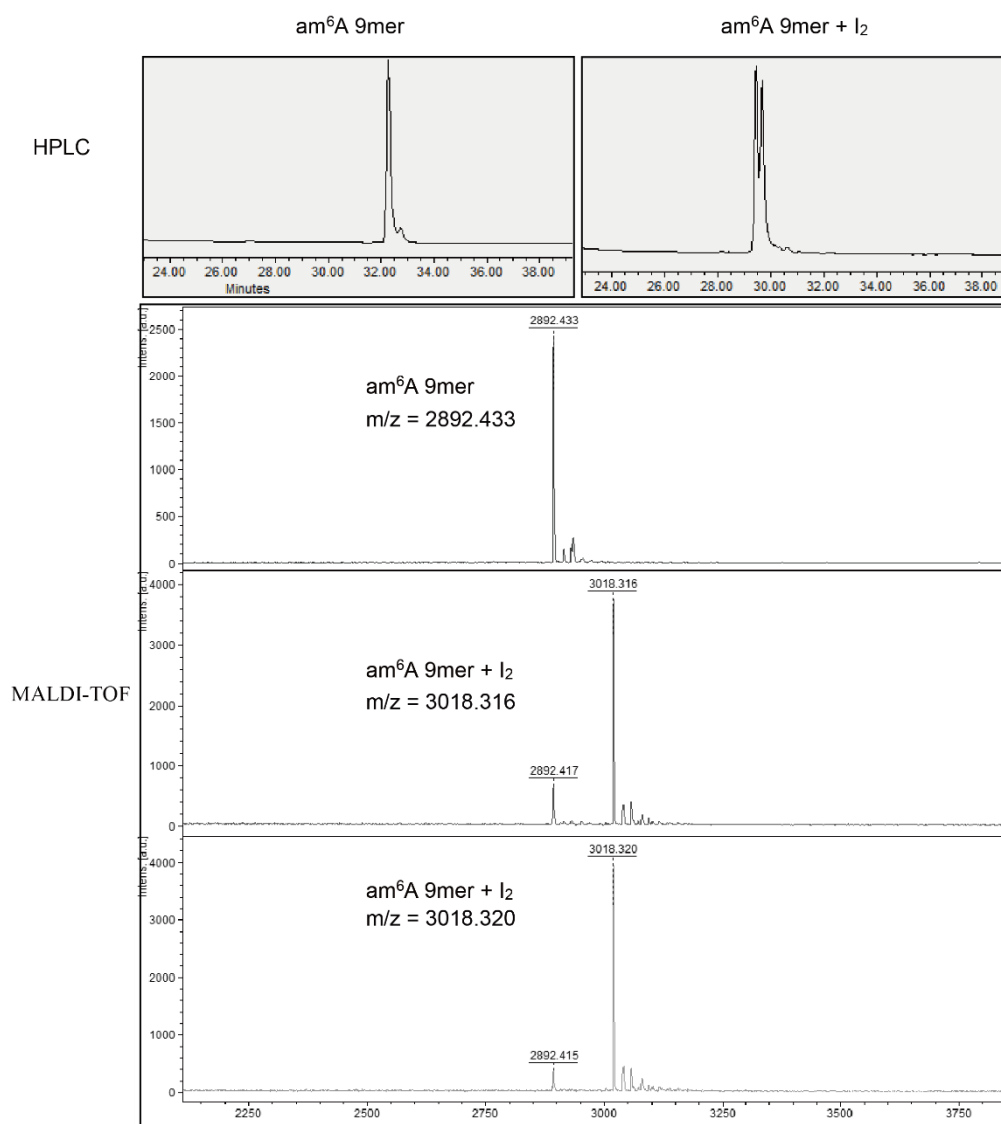

**Figure S2. I<sub>2</sub>-induced am<sup>6</sup>A cyclization is of 100% efficiency, related to Step 4e (Library preparation).**

A specific 9-mer RNA probe containing the am<sup>6</sup>A modification in the middle was treated by 125mM I<sub>2</sub> dissolved in 200mM KI for 1 h at RT in the darkness (It's suitable to put the reaction in the drawer beneath the bench). MALDI-TOF results show the 100% cyclization efficiency.

**A**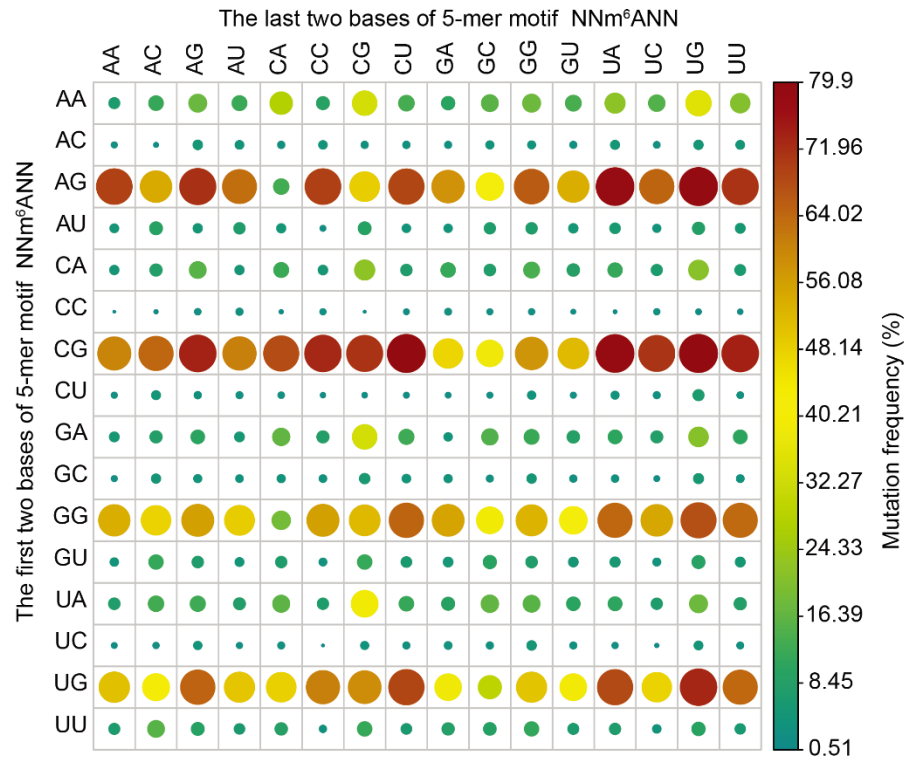**B**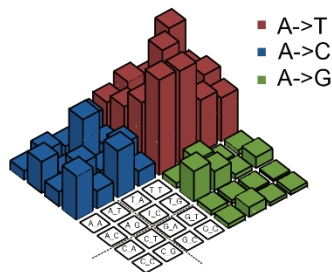**C**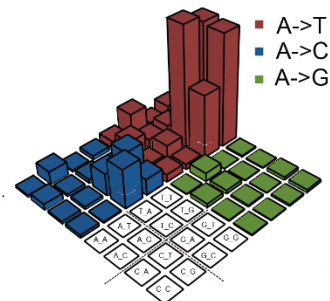

**Figure S3. Motif preference of MjDim1 methyltransferase and HIV reverse transcriptase validated with RNA probes, related to Step 4f (Library preparation).**

(A) Mutation frequency distribution of the RNA probes containing 5-mer motif (NNm<sup>6</sup>ANN) (Validation\_Probe\_NNm<sup>6</sup>ANN, Table S1) generated by m<sup>6</sup>A-SAC-seq. The 2-mer sequence of each row represents the first two base in the 5-mer motif and that of each column represents the last two bases in the 5-mer motif.

(B) Sequence context-dependent mutation pattern of HIV reverse transcriptase. Validation\_Probe\_NNm<sup>6</sup>ANN (Table S1) was cyclized by I<sub>2</sub> and subjected to RT reaction followed by next-generation sequencing. HIV reverse transcriptase shows negligible sequence context preference. The mismatch pattern is A into T and C > G.

(C) Mutation pattern of m<sup>6</sup>A-SAC-seq. Validation\_Probe\_NNm<sup>6</sup>ANN (Table S1) was subjected to m<sup>6</sup>A-sac-seq. The Mjdim1 enzyme prefers GA.

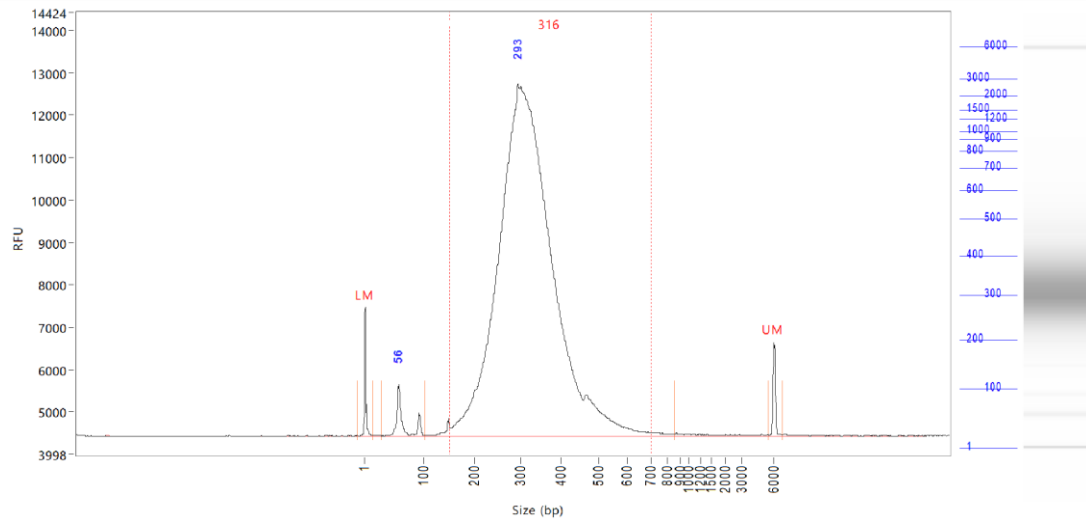

**Figure S4. Bioanalyzer profile of one typical m<sup>6</sup>A-SAC-seq library, related to Step 5h (Library preparation).**

Bioanalyzer profile of one typical m<sup>6</sup>A-SAC-seq library. The average size of the library is about 300bp.
